# Supplementary material for: Cytosine monohydrate under mechanical stress
Source: Royal Society of Chemistry journal article supplement (doi:10.1039/d3ce00293d), 2023-01-01
Supplement: d3ce00293d1.pdf [file d3ce00293d1.pdf]

## SUPPORTING INFORMATION

### Cytosine Monohydrate Crystals Under Mechanical Stress

Megan E. Fleming<sup>a</sup>, Daniel E. Hooks<sup>b,c</sup>, Michael McBride<sup>c</sup>, Nan Li<sup>c</sup> and Jennifer A. Swift<sup>a\*</sup>

**Fig. S1** Micrograph of CM crystals grown from aqueous solution and a schematic of the typical morphology. 2

**Fig. S2** Representative load-displacement curves from 6 different crystals, all with max load of 1000  $\mu\text{N}$ . The pop-in frequency and displacement depth varied from crystal to crystal. 2

**Fig. S3** Representative load-displacement curves from 6 different spots within the same CM crystal, with varying loads. Pop-ins are observed at minimum load of 150  $\mu\text{N}$  but otherwise vary in frequency and displacement depth. 3

**Fig. S4** Reduced modulus (top) and hardness (bottom) values derived from load-displacement curves from indents 100 - 8000  $\mu\text{N}$  show a scaling effect with increased loads. Values at contact depths < 110 nm and above 900 nm may have large associated errors owing to limitations of the contact geometry model. 3

**Fig. S5** Slip planes calculated using the CSD-Particle module in Mercury. 4

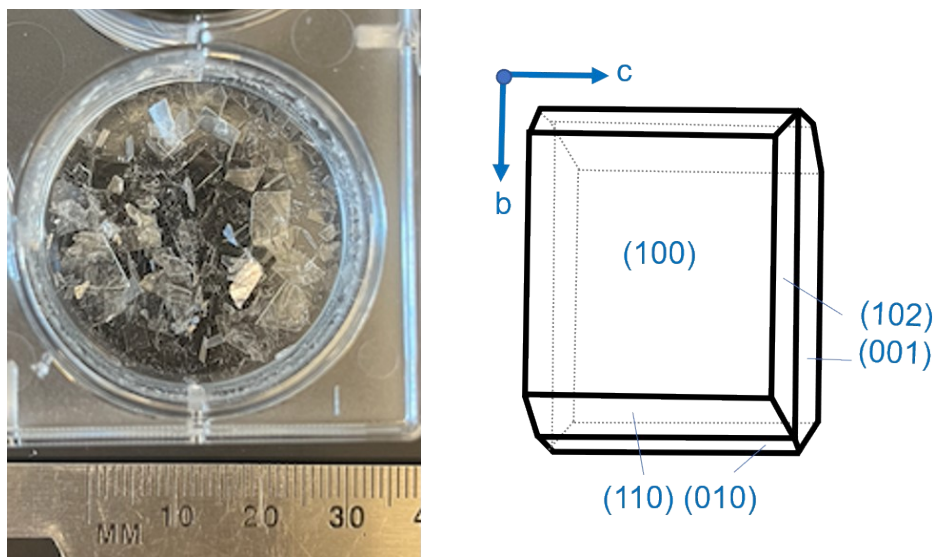

**Fig. S1** Micrograph of CM crystals grown from aqueous solution and a schematic of the typical morphology.

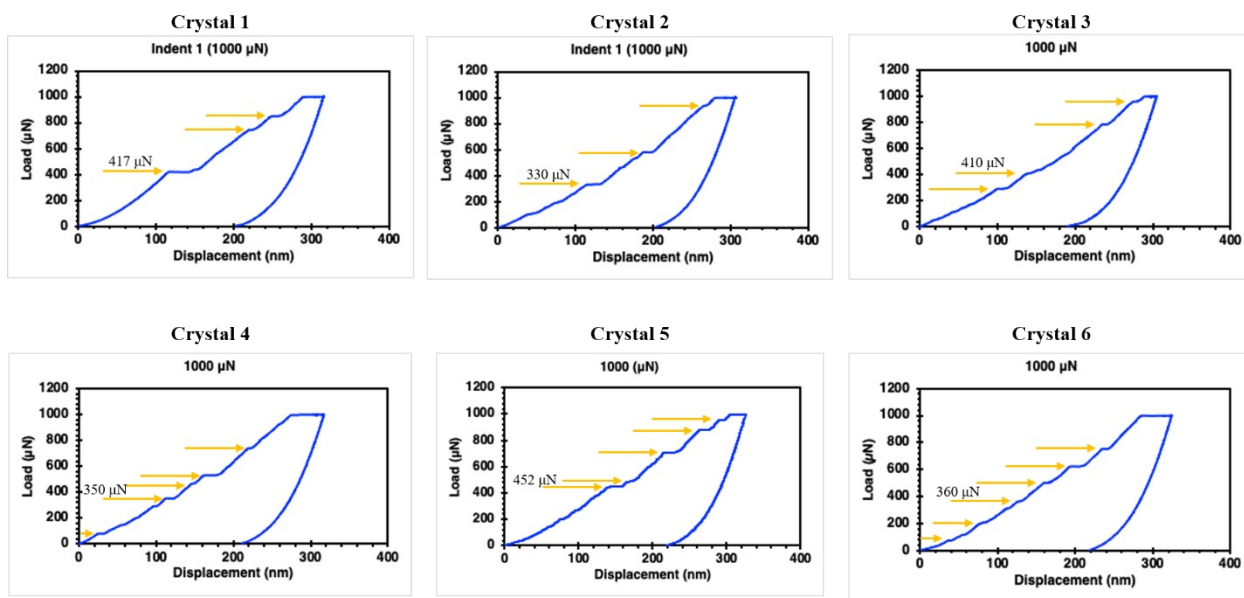

**Fig. S2** Representative load-displacement curves from 6 different crystals, all with max load of 1000  $\mu\text{N}$ . The pop-in frequency and displacement depth varied from crystal to crystal.

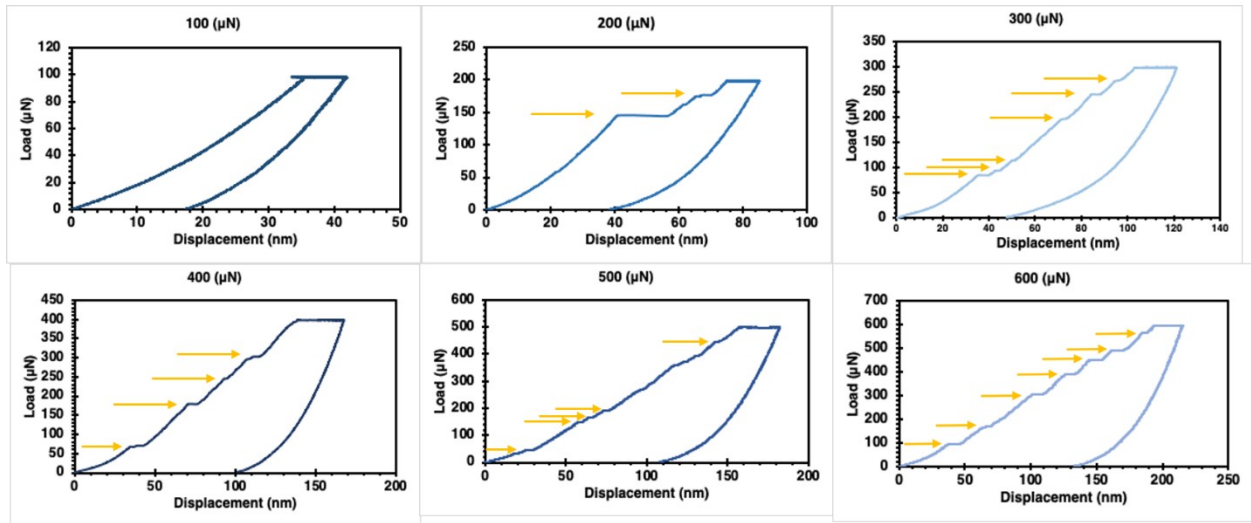

**Fig. S3** Representative load-displacement curves from 6 different spots within the same CM crystal, with varying loads. Pop-ins are observed at minimum load of 150  $\mu\text{N}$  but otherwise vary in frequency and displacement depth.

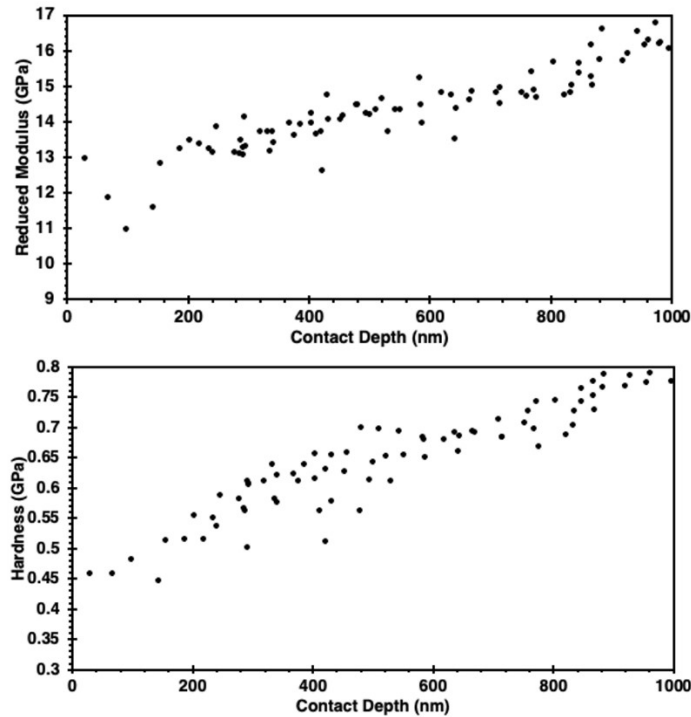

**Fig. S4** Reduced modulus (top) and hardness (bottom) values derived from load-displacement curves from indents 100 - 8000  $\mu\text{N}$  show a scaling effect with increased loads. Values at contact depths  $< 110$  nm and above 900 nm may have large associated errors owing to limitations of the contact geometry model.

Slip Planes... CYTOSM11

Minimum slab separation

Status Calculation completed

|    | Orientation | Slab separation | Repeat distance | Offset | H-bonded | Perpendicular planes |
|----|-------------|-----------------|-----------------|--------|----------|----------------------|
| 1  | (100)       | 1.228           | 7.675           | -3.837 | yes      | (102)                |
| 2  | (102)       | 0.536           | 3.188           | 0.000  | yes      | (100)                |
| 3  | (104)       | 0.209           | 1.768           | -0.884 | yes      | (100)                |
| 4  | (102)       | 0.105           | 3.188           | -1.978 | yes      | (100)                |
| 5  | (202)       | -0.070          | 2.494           | 0.000  | yes      |                      |
| 6  | (206)       | -0.096          | 1.142           | 0.000  | yes      | (100)                |
| 7  | (106)       | -0.111          | 1.212           | -0.606 | yes      | (100)                |
| 8  | (002)       | -0.136          | 3.781           | +0.726 | yes      | (100)                |
| 9  | (114)       | -0.146          | 1.740           | -0.870 | yes      | (100)                |
| 10 | (1-14)      | -0.146          | 1.740           | 0.000  | yes      | (100)                |
| 11 | (214)       | -0.258          | 1.573           | 0.000  | yes      | (100)                |
| 12 | (2-14)      | -0.258          | 1.573           | -0.787 | yes      | (100)                |
| 13 | (213)       | -0.272          | 1.924           | -0.962 | yes      | (100)                |
| 14 | (2-13)      | -0.272          | 1.924           | -0.962 | yes      | (100)                |
| 15 | (012)       | -0.275          | 3.528           | 0.000  | yes      | (100)                |
| 16 | (01-2)      | -0.275          | 3.528           | -1.764 | yes      | (100)                |
| 17 | (308)       | -0.281          | 0.842           | 0.000  | yes      | (100)                |
| 18 | (216)       | -0.290          | 1.135           | -0.567 | yes      | (100)                |
| 19 | (2-16)      | -0.290          | 1.135           | 0.000  | yes      | (100)                |
| 20 | (308)       | -0.295          | 0.842           | -0.007 | yes      | (100)                |

**Fig. S5** Slip planes calculated using the CSD-Particle module in Mercury.
